# Supplementary material
Source: ML conference proceedings conference paper supplement (https://proceedings.neurips.cc/paper_files/paper/2021/hash/30f8f6b940d1073d8b6a5eebc46dd6e5-Abstract.html)
Supplement: Supplementary file 1 [file 30f8f6b940d1073d8b6a5eebc46dd6e5-Supplemental.pdf]

---

# Supplementary Material for “Refined Learning Bounds for Kernel and Approximate $k$ -Means”

---

Yong Liu<sup>1,2</sup>

<sup>1</sup>Gaoling School of Artificial Intelligence, Renmin University of China, Beijing, China

<sup>2</sup>Beijing Key Laboratory of Big Data Management and Analysis Methods, Beijing, China  
liuyonggsai@ruc.edu.cn

## Appendix: Upper Bound for the Clustering Rademacher Complexity

Let  $\mathcal{F}_{\mathbf{C}}$  be a family of  $k$ -valued functions with

$$\mathcal{F}_{\mathbf{C}} := \left\{ f_{\mathbf{C}} = (f_{\mathbf{c}_1}, \dots, f_{\mathbf{c}_k}) : \mathbf{C} \in \mathcal{H}^k \right\}. \quad (1)$$

Let  $\varphi : \mathbb{R}^k \rightarrow \mathbb{R}$  be a minimum function:

$$\forall \alpha \in \mathbb{R}^k, \varphi(\alpha) = \min_{i=1, \dots, k} \alpha_i \quad (2)$$

and  $\mathcal{G}_{\mathbf{C}}$  be a “minimum” family of the functions  $\mathcal{F}_{\mathbf{C}}$ ,

$$\mathcal{G}_{\mathbf{C}} := \left\{ g_{\mathbf{C}} = \varphi \circ f_{\mathbf{C}} \mid f_{\mathbf{C}} \in \mathcal{F}_{\mathbf{C}}, g_{\mathbf{C}}(\mathbf{x}) = \varphi(f_{\mathbf{C}}(\mathbf{x})) \right\}. \quad (3)$$

**Definition 1** (Clustering Rademacher Complexity). *Let  $\mathcal{G}_{\mathbf{C}}$  be a family of functions defined in (3),  $\mathcal{S} = (\mathbf{x}_1, \dots, \mathbf{x}_n)$  be a fixed sample of size  $n$  with elements in  $\mathcal{X}$ , and  $\mathcal{D} = \{\Phi_i = \psi(\mathbf{x}_i)\}_{i=1}^n$ . Then, the clustering empirical Rademacher complexity of  $\mathcal{G}_{\mathbf{C}}$  with respect to  $\mathcal{D}$  is defined by*

$$\mathcal{R}_n(\mathcal{G}_{\mathbf{C}}) = \mathbb{E}_{\sigma} \left[ \sup_{g_{\mathbf{C}} \in \mathcal{G}_{\mathbf{C}}} \left| \sum_{i=1}^n \sigma_i g_{\mathbf{C}}(\mathbf{x}_i) \right| \right],$$

where  $\sigma_1, \dots, \sigma_n$  are independent random variables with equal probability of taking values  $+1$  or  $-1$ . Its expectation is  $\mathcal{R}(\mathcal{G}_{\mathbf{C}}) = \mathbb{E}[\mathcal{R}_n(\mathcal{G}_{\mathbf{C}})]$ .

Based on the recently improvement of the upper bound of Rademacher complexity of  $L$ -Lipschitz with respect to the  $L_{\infty}$  norm [5], we provide a refined bound of clustering Rademacher complexity:

**Lemma 1.** *If  $\forall \mathbf{x} \in \mathcal{X}, \|\Phi_{\mathbf{x}}\| \leq 1$ , then, for any  $\mathcal{S} = \{\mathbf{x}_1, \dots, \mathbf{x}_n\} \in \mathcal{X}^n$ , there exists a constant  $c > 0$  such that*

$$\mathcal{R}_n(\mathcal{G}_{\mathbf{C}}) \leq c\sqrt{k} \max_i \tilde{\mathcal{R}}_n(\mathcal{F}_{\mathbf{C}_i}) \log^2(\sqrt{n}),$$

where  $\mathcal{G}_{\mathbf{C}}$  is a family of clustering functions defined in (3),  $\mathcal{F}_{\mathbf{C}}$  is a family of  $k$ -valued functions associate with the clustering center  $\mathbf{C} = [\mathbf{c}_1, \dots, \mathbf{c}_k]$  defined in (1),  $\mathcal{F}_{\mathbf{C}_i}$  is a family of the output coordinate  $i$  of  $\mathcal{F}_{\mathbf{C}}$ , and  $\tilde{\mathcal{R}}_n(\mathcal{F}_{\mathbf{C}_i}) = \sup_{\mathcal{S} \in \mathcal{X}^n} \mathcal{R}_n(\mathcal{F}_{\mathbf{C}_i})$ .

The above result shows that the upper bound of the clustering Rademacher complexity is linearly dependent on  $\sqrt{k}$ , which substantially improves the existing bounds linearly dependent on  $k$ .

**Remark.** The upper bound of the clustering Rademacher complexity involves a constant  $c$  and a logarithmic term  $\log(n)$ . Thus, if one requires its absolute value to be smaller than the existing bounds defined, there may exist some cases which acquire a large  $k$ . However, from a statistical perspective, our bound with linear dependence on  $\sqrt{k}$  substantially improves the existing ones with linear dependence on  $k$ .

In the following, we will show that Lemma 1 cannot be improved from a statistical view when ignoring the logarithmic terms.

**Lemma 2.** *There exists a set  $\mathbf{C} \in \mathcal{H}^k$  and data sequence  $\mathcal{D} = \{\Phi_1, \dots, \Phi_n\}$  such that*

$$\mathcal{R}_n(\mathcal{G}_{\mathbf{C}}) \geq \frac{\sqrt{k}}{3\sqrt{2}} \cdot \max_i \tilde{\mathcal{R}}_n(\mathcal{F}_{\mathbf{C}_i}).$$

Lemma 2 shows that the lower bound of  $\mathcal{R}_n(\mathcal{G}_{\mathbf{C}})$  is  $\Omega(\sqrt{k} \max_i \tilde{\mathcal{R}}_n(\mathcal{F}_{\mathbf{C}_i}))$ , which implies that the upper bound of order  $\tilde{\mathcal{O}}(\sqrt{k} \max_i \tilde{\mathcal{R}}_n(\mathcal{F}_{\mathbf{C}_i}))$  in Lemma 1 is **(nearly) optimal** when ignoring the logarithmic terms

**Remark.** A lower bound linearly dependent on  $k$  for a  $k$ -valued function class  $\mathcal{F} \subseteq \{f : \mathcal{X} \rightarrow \mathbb{R}^k\}$  has been given in [5],

$$\mathcal{R}_n(\phi \circ \mathcal{F}) \geq \frac{k}{2\sqrt{2}} \cdot \max_i \tilde{\mathcal{R}}_n(\phi \circ \mathcal{F}_i),$$

which does not match the upper bound of  $\sqrt{k}$ . However our bound in Lemma 2 does match.

## Appendix: Proof of Lemma 1

To prove Lemma 1, we first give the following two lemmas:

**Lemma 3** ( $L_\infty$  Contraction Inequality, Theorem 1 in [5]). *Let  $\mathcal{F} \subseteq \{f : \mathcal{X} \rightarrow \mathbb{R}^k\}$ , and let  $\phi : \mathbb{R}^k \rightarrow \mathbb{R}$  be  $L$ -Lipschitz with respect to the  $L_\infty$  norm, that is  $\|\phi(\mathbf{v}) - \phi(\mathbf{v}')\|_\infty \leq L \cdot \|\mathbf{v} - \mathbf{v}'\|_\infty$ ,  $\forall \mathbf{v}, \mathbf{v}' \in \mathbb{R}^k$ . For any  $a > 0$ , there exists a constant  $C > 0$  such that if  $\max\{|\phi(f(\mathbf{x}))|, \|f(\mathbf{x})\|_\infty\} \leq \rho$ , then*

$$\mathcal{R}_n(\phi \circ \mathcal{F}) \leq C \cdot L\sqrt{k} \max_i \tilde{\mathcal{R}}_n(\mathcal{F}_i) \log^{\frac{3}{2}+a} \left( \frac{\rho n}{\max_i \tilde{\mathcal{R}}_n(\mathcal{F}_i)} \right),$$

where  $\mathcal{R}_n(\phi \circ \mathcal{F}) = \mathbb{E}_\sigma [\sup_{f \in \mathcal{F}} |\sum_{i=1}^n \sigma_i \phi(f(\mathbf{x}_i))|]$ ,  $\tilde{\mathcal{R}}_n(\mathcal{F}_i) = \sup_{\mathcal{S} \in \mathcal{X}^n} \mathcal{R}_n(\mathcal{F}_i)$ .

**Lemma 4** (Lemma 24(a) in [7] with  $p = 2$ ). *Let  $\eta_1, \dots, \eta_n \in \mathcal{H}$ , where  $\mathcal{H}$  is a Hilbert space with  $\|\cdot\|$  being the associated norm. Let  $\sigma_1, \dots, \sigma_n$  be a sequence of independent Rademacher variables. Then, we have*

$$\mathbb{E}_\sigma \left\| \sum_{i=1}^n \sigma_i \eta_i \right\|^2 \leq \sum_{i=1}^n \|\eta_i\|^2 \quad (4)$$

and

$$\mathbb{E} \left\| \sum_{i=1}^n \sigma_i \eta_i \right\| \geq \frac{\sqrt{2}}{2} \sqrt{\sum_{i=1}^n \|\eta_i\|^2}. \quad (5)$$

*Proof of Lemma 1.* We first show that the minimum function

$$\varphi(\boldsymbol{\nu}) = \min(\nu_1, \dots, \nu_k)$$

defined in (2) is 1-Lipschitz continuous with respect to the  $L_\infty$ -norm, that is

$$\forall \boldsymbol{\nu}, \boldsymbol{\nu}' \in \mathbb{R}^k, |\varphi(\boldsymbol{\nu}) - \varphi(\boldsymbol{\nu}')| \leq \|\boldsymbol{\nu} - \boldsymbol{\nu}'\|_\infty. \quad (6)$$

Without loss of generality, we assume that  $\varphi(\boldsymbol{\nu}) \geq \varphi(\boldsymbol{\nu}')$ . Let

$$j = \arg \min_{i=1, \dots, k} \nu'_i,$$

then from the definition of  $\varphi$ , we know that  $\varphi(\boldsymbol{\nu}') = \nu'_j$ . Thus, we can obtain that

$$\begin{aligned} |\varphi(\boldsymbol{\nu}) - \varphi(\boldsymbol{\nu}')| &= \varphi(\boldsymbol{\nu}) - \nu'_j \\ &\leq \nu_j - \nu'_j && \text{(by the fact that } \varphi(\boldsymbol{\nu}) \leq \nu_j) \\ &\leq \|\boldsymbol{\nu} - \boldsymbol{\nu}'\|_\infty. \end{aligned}$$

We then show that  $\max\{|\varphi(f_{\mathbf{C}}(\mathbf{x}))|, \|f_{\mathbf{C}}(\mathbf{x})\|_{\infty}\}$  is bounded by a constant. From the definition of  $f_{\mathbf{C}}$  (see Eq.(1)), we know that

$$f_{\mathbf{C}}(\mathbf{x}) = (f_{\mathbf{c}_1}(\mathbf{x}) \cdots, f_{\mathbf{c}_k}(\mathbf{x})) \text{ and } f_{\mathbf{c}_j}(\mathbf{x}) = \|\Phi_{\mathbf{x}} - \mathbf{c}_j\|^2.$$

Note that  $\|\Phi_{\mathbf{x}}\| \leq 1$  and  $\mathbf{c}_j \in \mathcal{H}$ , so we have

$$\|\mathbf{c}_j\| \leq 1 \text{ and } f_{\mathbf{c}_j}(\mathbf{x}) \leq 2\|\Phi_{\mathbf{x}}\| + 2\|\mathbf{c}_j\| \leq 4, \forall \mathbf{x} \in \mathcal{X}. \quad (7)$$

Thus, one can see that

$$\|f_{\mathbf{C}}(\mathbf{x})\|_{\infty} = \max_j |f_{\mathbf{c}_j}(\mathbf{x})| \leq 4 \text{ and } |\varphi(f_{\mathbf{C}}(\mathbf{x}))| = \left| \min_{j=1, \dots, k} f_{\mathbf{c}_j}(\mathbf{x}) \right| \leq 4.$$

From the above analysis, we know that  $\varphi(\nu)$  is 1-continuous with respect to the  $L_{\infty}$ -norm, and  $\max\{|\varphi(f_{\mathbf{C}}(\mathbf{x}))|, \|f_{\mathbf{C}}(\mathbf{x})\|_{\infty}\} \leq 4$ . Thus, using Lemma 3 with  $L = 1$ ,  $\rho = 4$  and  $a = 1/2$ , we have

$$\mathcal{R}_n(\mathcal{G}_{\mathbf{C}}) \leq C\sqrt{k} \max_i \tilde{\mathcal{R}}_n(\mathcal{F}_{\mathbf{C}_i}) \log^2 \left( \frac{4n}{\max_i \tilde{\mathcal{R}}_n(\mathcal{F}_{\mathbf{C}_i})} \right). \quad (8)$$

Let

$$c_i := \sup_{\mathbf{x} \in \mathcal{X}} \sup_{f_{\mathbf{c}} \in \mathcal{F}_{\mathbf{C}_i}} |f_{\mathbf{c}}(\mathbf{x})| \text{ and } c = \max\{c_i, i = 1, \dots, k\}. \quad (9)$$

From (7), we know that  $c$  is a constant and  $c \leq 4$ . By definition of  $\tilde{\mathcal{R}}_n(\mathcal{F}_{\mathbf{C}_i})$ , we can obtain that

$$\begin{aligned} \forall j, \tilde{\mathcal{R}}_n(\mathcal{F}_{\mathbf{C}_j}) &= \sup_{S \in \mathcal{X}^n} \mathbb{E}_{\sigma} \left[ \sup_{f_{\mathbf{c}} \in \mathcal{F}_{\mathbf{C}_j}} \left| \sum_{i=1}^n \sigma_i f_{\mathbf{c}}(\mathbf{x}_i) \right| \right] \\ &\geq \sup_{\mathbf{x} \in \mathcal{X}} \mathbb{E}_{\sigma} \left[ \sup_{f_{\mathbf{c}} \in \mathcal{F}_{\mathbf{C}_j}} \left| \sum_{i=1}^n \sigma_i f_{\mathbf{c}}(\mathbf{x}) \right| \right] \\ &\geq \sup_{\mathbf{x} \in \mathcal{X}, f_{\mathbf{c}} \in \mathcal{F}_{\mathbf{C}_j}} \mathbb{E}_{\sigma} \left| \sum_{i=1}^n \sigma_i f_{\mathbf{c}}(\mathbf{x}) \right| \quad (\text{by Jensen's inequality}) \\ &\geq \frac{\sqrt{2n}}{2} \sup_{\mathbf{x} \in \mathcal{X}, f_{\mathbf{c}} \in \mathcal{F}_{\mathbf{C}_j}} \sqrt{|f_{\mathbf{c}}(\mathbf{x})|} \quad (\text{by Eq.(5) of Lemma 4}) \\ &= \frac{\sqrt{2nc_j}}{2} \quad (\text{by Eq.(9)}). \end{aligned} \quad (10)$$

Thus, one can see that  $\max_i \tilde{\mathcal{R}}_n(\mathcal{F}_{\mathbf{C}_i}) \geq \frac{\sqrt{2cn}}{2}$ , where  $c = \max\{c_i, i = 1, \dots, k\}$ . So, we have  $\frac{n}{\max_i \tilde{\mathcal{R}}_n(\mathcal{F}_{\mathbf{C}_i})} \leq \sqrt{\frac{2n}{c}}$ . Plugging this into (8) proves the result.  $\square$

## Appendix: Proof of Theorem 1

To prove Theorem 1, we first give the following two lemmas:

**Lemma 5.** *If  $\forall \mathbf{x} \in \mathcal{X}$ ,  $\|\Phi_{\mathbf{x}}\| \leq 1$ , then for all  $S \in \mathcal{X}^n$  and  $\mathbf{C} \in \mathcal{H}^k$ , we have*

$$\max_i \tilde{\mathcal{R}}_n(\mathcal{F}_{\mathbf{C}_i}) \leq 3\sqrt{n}.$$

*Proof.*  $\forall S \in \mathcal{X}^n$ ,  $\mathbf{C} \in \mathcal{H}^k$  and  $i \in \{1, \dots, k\}$ , we have

$$\begin{aligned}
\mathcal{R}_n(\mathcal{F}_{\mathbf{C}_i}) &= \mathbb{E}_{\boldsymbol{\sigma}} \sup_{f_{\mathbf{c}} \in \mathcal{F}_{\mathbf{C}_i}} \left| \sum_{j=1}^n \sigma_j f_{\mathbf{c}}(\mathbf{x}_j) \right| \\
&= \mathbb{E}_{\boldsymbol{\sigma}} \sup_{\mathbf{c} \in \mathcal{H}} \left| \sum_{j=1}^n \sigma_j \|\Phi_j - \mathbf{c}\|^2 \right| \\
&= \mathbb{E}_{\boldsymbol{\sigma}} \sup_{\mathbf{c} \in \mathcal{H}} \left| \sum_{j=1}^n \sigma_j [-2\langle \Phi_j, \mathbf{c} \rangle + \|\mathbf{c}\|^2 + \|\Phi_j\|^2] \right| \\
&= \mathbb{E}_{\boldsymbol{\sigma}} \sup_{\mathbf{c} \in \mathcal{H}} \left| \sum_{j=1}^n \sigma_j [-2\langle \Phi_j, \mathbf{c} \rangle + \|\mathbf{c}\|^2] \right| \\
&\leq 2\mathbb{E}_{\boldsymbol{\sigma}} \sup_{\mathbf{c} \in \mathcal{H}} \left| \sum_{j=1}^n \sigma_j \langle \Phi_j, \mathbf{c} \rangle \right| + \mathbb{E}_{\boldsymbol{\sigma}} \sup_{\mathbf{c} \in \mathcal{H}} \left| \sum_{j=1}^n \sigma_j \|\mathbf{c}\|^2 \right|.
\end{aligned} \tag{11}$$

One can see that

$$\begin{aligned}
\mathbb{E}_{\boldsymbol{\sigma}} \sup_{\mathbf{c} \in \mathcal{H}} \left| \sum_{j=1}^n \sigma_j \|\mathbf{c}\|^2 \right| &\leq \mathbb{E}_{\boldsymbol{\sigma}} \left| \sum_{j=1}^n \sigma_j \right| \quad (\text{since } \|\mathbf{c}\| \leq 1) \\
&\leq \sqrt{\mathbb{E}_{\boldsymbol{\sigma}} \left| \sum_{j=1}^n \sigma_j \right|^2} \leq \sqrt{n} \quad (\text{by Eq.(4) of Lemma 4}),
\end{aligned} \tag{12}$$

and

$$\begin{aligned}
\mathbb{E}_{\boldsymbol{\sigma}} \sup_{\mathbf{c} \in \mathcal{H}} \left| \sum_{j=1}^n \sigma_j \langle \Phi_j, \mathbf{c} \rangle \right| &= \mathbb{E}_{\boldsymbol{\sigma}} \sup_{\mathbf{c} \in \mathcal{H}} \left| \left\langle \sum_{j=1}^n \sigma_j \Phi_j, \mathbf{c} \right\rangle \right| \\
&\leq \mathbb{E}_{\boldsymbol{\sigma}} \left\| \sum_{j=1}^n \sigma_j \Phi_j \right\| \quad (\text{by } \|\mathbf{c}\| \leq 1) \\
&\leq \sqrt{\mathbb{E}_{\boldsymbol{\sigma}} \left\| \sum_{j=1}^n \sigma_j \Phi_j \right\|^2} \leq \sqrt{\sum_{i=1}^n \|\Phi_i\|^2} \quad (\text{by Eq.(4) of Lemma 4}) \\
&\leq \sqrt{n} \quad (\text{since } \|\Phi_i\| \leq 1).
\end{aligned} \tag{13}$$

Substituting (12) and (13) into (11), we can prove the result.  $\square$

To prove Theorem 1, we first propose the following lemma:

**Lemma 6.** *For any  $\delta \in (0, 1)$ , with probability  $1 - \delta$ , there exists a constant  $c > 0$ , such that*

$$\mathcal{R}(\mathcal{G}_{\mathbf{C}}) \leq c\sqrt{kn} \log^2(\sqrt{n}) + \sqrt{2n \log\left(\frac{1}{\delta}\right)}.$$

*Proof.* From [8] or [1], with probability  $1 - \delta$ , we have

$$\mathcal{R}(\mathcal{G}_{\mathbf{C}}) \leq \mathcal{R}_n(\mathcal{G}_{\mathbf{C}}) + \sqrt{2n \log\left(\frac{1}{\delta}\right)}. \tag{14}$$

Thus, we have

$$\begin{aligned}
& \mathcal{R}(\mathcal{G}_{\mathbf{C}}) \\
& \leq \mathcal{R}_n(\mathcal{G}_{\mathbf{C}}) + \sqrt{2n \log \left( \frac{1}{\delta} \right)} \\
& \leq c\sqrt{k} \max_i \tilde{\mathcal{R}}_n(\mathcal{F}_{\mathbf{C}_i}) \log^2(\sqrt{n}) + \sqrt{2n \log \left( \frac{1}{\delta} \right)} \quad (\text{by Lemma 1}) \\
& \leq 3c\sqrt{kn} \log^2(\sqrt{n}) + \sqrt{2n \log \left( \frac{1}{\delta} \right)}. \quad (\text{by Lemma 5})
\end{aligned}$$

□

*Proof of Theorem 1.* The starting point of our analysis is the following elementary inequality (see Ch.8 in [4] or page 2 in [3]):

$$\begin{aligned}
& \mathbb{E}[\mathcal{W}(\mathbf{C}_n, \mathbb{P})] - \mathcal{W}^*(\mathbb{P}) \\
& = \mathbb{E}[\mathcal{W}(\mathbf{C}_n, \mathbb{P}) - \mathcal{W}(\mathbf{C}_n, \mathbb{P}_n)] + \mathbb{E}[\mathcal{W}(\mathbf{C}_n, \mathbb{P}_n)] - \mathcal{W}^*(\mathbb{P}) \\
& \leq \mathbb{E}[\mathcal{W}(\mathbf{C}_n, \mathbb{P}) - \mathcal{W}(\mathbf{C}_n, \mathbb{P}_n)] + \mathbb{E}[\mathcal{W}(\mathbf{C}^*, \mathbb{P}_n)] - \mathcal{W}^*(\mathbb{P}) \\
& \quad (\mathcal{W}(\mathbf{C}_n, \mathbb{P}_n) \leq \mathcal{W}(\mathbf{C}^*, \mathbb{P}_n) \text{ as } \mathbf{C}_n \text{ is optimal w.r.t. } \mathcal{W}(\cdot, \mathbb{P}_n)) \\
& \leq \mathbb{E} \sup_{\mathbf{C} \in \mathcal{H}^k} (\mathcal{W}(\mathbf{C}, \mathbb{P}) - \mathcal{W}(\mathbf{C}, \mathbb{P}_n)) + \sup_{\mathbf{C} \in \mathcal{H}^k} \mathbb{E}[\mathcal{W}(\mathbf{C}, \mathbb{P}_n) - \mathcal{W}(\mathbf{C}, \mathbb{P})] \\
& \leq 2\mathbb{E} \sup_{\mathbf{C} \in \mathcal{H}^k} |\mathcal{W}(\mathbf{C}, \mathbb{P}_n) - \mathcal{W}(\mathbf{C}, \mathbb{P})|.
\end{aligned} \tag{15}$$

Let  $\mathbf{x}'_1, \dots, \mathbf{x}'_n$  be a copy of  $\mathbf{x}_1, \dots, \mathbf{x}_n$ , independent of the  $\sigma_i$ 's. Then, by a standard symmetrization argument [1] (can also be seen in the proof of Lemma 4.3 of [3]), we can write

$$\begin{aligned}
\mathbb{E} \sup_{\mathbf{C} \in \mathcal{H}^k} |\mathcal{W}(\mathbf{C}, \mathbb{P}_n) - \mathcal{W}(\mathbf{C}, \mathbb{P})| & \leq \mathbb{E} \sup_{g_{\mathbf{C}} \in \mathcal{G}_{\mathbf{C}}} \left| \frac{1}{n} \sum_{i=1}^n \sigma_i [g_{\mathbf{C}}(\mathbf{x}) - g_{\mathbf{C}}(\mathbf{x}')] \right| \\
& \leq 2\mathbb{E} \sup_{g_{\mathbf{C}} \in \mathcal{G}_{\mathbf{C}}} \left| \frac{1}{n} \sum_{i=1}^n \sigma_i g_{\mathbf{C}}(\mathbf{x}) \right| = \frac{2}{n} \mathcal{R}(\mathcal{G}_{\mathbf{C}}).
\end{aligned} \tag{16}$$

Thus, we can obtain that

$$\begin{aligned}
\mathbb{E}[\mathcal{W}(\mathbf{C}_n, \mathbb{P})] - \mathcal{W}^*(\mathbb{P}) & \leq \frac{4}{n} \mathcal{R}(\mathcal{G}_{\mathbf{C}}) \text{ (by Eq.(15) and Eq.(16))} \\
& \leq 4c\sqrt{\frac{k}{n}} \log^2(\sqrt{n}) + 4\sqrt{\frac{2 \log \frac{1}{\delta}}{n}} \quad (\text{by Lemma 6}).
\end{aligned}$$

This proves the result. □

## Appendix: Proof of Theorem 2

*Proof.* Note that

$$\begin{aligned}
& \mathbb{E}[\mathcal{W}(\tilde{\mathbf{C}}_n, \mathbb{P})] - \mathcal{W}^*(\mathbb{P}) \\
& = \underbrace{\mathbb{E}[\mathcal{W}(\tilde{\mathbf{C}}_n, \mathbb{P}) - \mathcal{W}(\tilde{\mathbf{C}}_n, \mathbb{P}_n)]}_{A_1} + \underbrace{\mathbb{E}[\mathcal{W}(\tilde{\mathbf{C}}_n, \mathbb{P}_n) - \mathcal{W}(\mathbf{C}_n, \mathbb{P}_n)]}_{A_2} \\
& \quad + \underbrace{\mathbb{E}[\mathcal{W}(\mathbf{C}_n, \mathbb{P}_n) - \mathcal{W}(\mathbf{C}_n, \mathbb{P})]}_{A_3} + \underbrace{\mathbb{E}[\mathcal{W}(\mathbf{C}_n, \mathbb{P})] - \mathcal{W}^*(\mathbb{P})}_{A_4}.
\end{aligned}$$

Also note that  $A_2$  is bounded by  $\zeta$ , and  $A_4$  can be obtained from Theorem 1. From Eq.(16), we know that  $A_1$  and  $A_3$  can be bounded by the Rademacher complexity:

$$\begin{aligned} A_1 &\leq \mathbb{E} \sup_{\mathbf{C} \in \mathcal{H}^k} |\mathcal{W}(\mathbf{C}, \mathbb{P}_n) - \mathcal{W}(\mathbf{C}, \mathbb{P})| \leq \frac{2}{n} \mathcal{R}(\mathcal{G}_{\mathbf{C}}), \\ A_3 &\leq \mathbb{E} \sup_{\mathbf{C} \in \mathcal{H}^k} |\mathcal{W}(\mathbf{C}, \mathbb{P}_n) - \mathcal{W}(\mathbf{C}, \mathbb{P})| \leq \frac{2}{n} \mathcal{R}(\mathcal{G}_{\mathbf{C}}). \end{aligned}$$

Thus, we can obtain that

$$\mathbb{E}[\mathcal{W}(\tilde{\mathbf{C}}_n, \mathbb{P})] - \mathcal{W}^*(\mathbb{P}) \leq \frac{4}{n} \mathcal{R}(\mathcal{G}_{\mathbf{C}}) + c\sqrt{\frac{k}{n}} \log^2(\sqrt{n}) + c\sqrt{\frac{\log \frac{1}{\delta}}{n}} + \zeta. \quad (17)$$

Substituting Lemma 6 into Eq.(17), we can prove the result.  $\square$

### Appendix: Proof of Theorem 3

*Proof.* Note that

$$\mathbb{E} \left[ \mathbb{E}_{\mathcal{A}}[\mathcal{W}(\mathbf{C}_n^{\mathcal{A}}, \mathbb{P})] \right] = \mathbb{E} \left[ \mathbb{E}_{\mathcal{A}}[\mathcal{W}(\mathbf{C}_n^{\mathcal{A}}, \mathbb{P})] - \mathbb{E}_{\mathcal{A}}[\mathcal{W}(\mathbf{C}_n^{\mathcal{A}}, \mathbb{P}_n)] \right] + \mathbb{E} \left[ \mathbb{E}_{\mathcal{A}}[\mathcal{W}(\mathbf{C}_n^{\mathcal{A}}, \mathbb{P}_n)] \right].$$

From Lemma 2, we can obtain that

$$\begin{aligned} \mathbb{E} \left[ \mathbb{E}_{\mathcal{A}}[\mathcal{W}(\mathbf{C}_n^{\mathcal{A}}, \mathbb{P}_n)] \right] &\leq \beta \cdot \mathbb{E}[\mathcal{W}(\mathbf{C}_n, \mathbb{P}_n)] \\ &= \beta \cdot \mathbb{E}[\mathcal{W}(\mathbf{C}_n, \mathbb{P}_n) - \mathcal{W}(\mathbf{C}_n, \mathbb{P})] + \beta \cdot \mathbb{E}[\mathcal{W}(\mathbf{C}_n, \mathbb{P})]. \end{aligned}$$

Thus, we can obtain that

$$\begin{aligned} \mathbb{E} \left[ \mathbb{E}_{\mathcal{A}}[\mathcal{W}(\mathbf{C}_n^{\mathcal{A}}, \mathbb{P})] \right] &\leq \underbrace{\mathbb{E} \left[ \mathbb{E}_{\mathcal{A}}[\mathcal{W}(\mathbf{C}_n^{\mathcal{A}}, \mathbb{P})] - \mathbb{E}_{\mathcal{A}}[\mathcal{W}(\mathbf{C}_n^{\mathcal{A}}, \mathbb{P}_n)] \right]}_{A_1} \\ &\quad + \underbrace{\beta \cdot \mathbb{E}[\mathcal{W}(\mathbf{C}_n, \mathbb{P}_n) - \mathcal{W}(\mathbf{C}_n, \mathbb{P})]}_{A_2} + \underbrace{\beta \cdot \mathbb{E}[\mathcal{W}(\mathbf{C}_n, \mathbb{P})]}_{A_3}. \end{aligned} \quad (18)$$

Note that

$$\begin{aligned} A_1, A_2 &\leq \mathbb{E} \sup_{\mathbf{C} \in \mathcal{H}^k} |\mathcal{W}(\mathbf{C}, \mathbb{P}_n) - \mathcal{W}(\mathbf{C}, \mathbb{P})| \\ &\leq \frac{2}{n} \mathcal{R}(\mathcal{G}_{\mathbf{C}}) \quad (\text{by Eq.(16)}) \\ &\leq \tilde{\mathcal{O}} \left( \sqrt{\frac{k}{n}} \right). \quad (\text{by Lemma 6}) \end{aligned} \quad (19)$$

By Theorem 1, we can obtain that

$$\mathbb{E}[\mathcal{W}(\mathbf{C}_n, \mathbb{P})] \leq \mathcal{W}^*(\mathbb{P}) + c\sqrt{\frac{k}{n}} \log^2(\sqrt{n}) + c\sqrt{\frac{\log \frac{1}{\delta}}{n}}.$$

Substituting the above inequality and Eq.(19) into Eq.(18), we have

$$\mathbb{E} \left[ \mathbb{E}_{\mathcal{A}}[\mathcal{W}(\mathbf{C}_n^{\mathcal{A}}, \mathbb{P}_n)] \right] \leq \tilde{\mathcal{O}} \left( \sqrt{\frac{k}{n}} + \mathcal{W}^*(\mathbb{P}) \right).$$

$\square$

## Appendix: Proof of Theorem 4

To prove Theorem 4, we first propose the following lemma:

**Lemma 7.** *With probability at least  $1 - \delta$ , we have*

$$\mathbb{E}[\mathcal{W}(\mathbf{C}_{n,m}, \mathbb{P}_n) - \mathcal{W}(\mathbf{C}_{n,m}, \mathbb{P})] \leq \tilde{\mathcal{O}}\left(\sqrt{\frac{k}{n}}\right).$$

*Proof.* Note that

$$\begin{aligned} \mathbb{E}[\mathcal{W}(\mathbf{C}_{n,m}, \mathbb{P}_n) - \mathcal{W}(\mathbf{C}_{n,m}, \mathbb{P})] &\leq \mathbb{E} \sup_{\mathbf{C} \in \mathcal{H}^k} |\mathcal{W}(\mathbf{C}, \mathbb{P}_n) - \mathcal{W}(\mathbf{C}, \mathbb{P})| \\ &\leq \frac{2}{n} \mathcal{R}(\mathcal{G}_{\mathbf{C}}) && \text{(by Eq.(16))} \\ &= \tilde{\mathcal{O}}\left(\sqrt{\frac{k}{n}}\right) && \text{(by Lemma 6).} \end{aligned}$$

This proves the result.  $\square$

**Lemma 8.** *If constructing  $\mathcal{I}$  by uniformly sampling*

$$m \geq C\sqrt{n} \log(1/\delta) \min(k, \Xi)/\sqrt{k},$$

*then for all  $S \in \mathcal{X}^n$ , with probability at least  $1 - \delta$ , we have*

$$\mathcal{W}(\mathbf{C}_{n,m}, \mathbb{P}_n) - \mathcal{W}(\mathbf{C}_n, \mathbb{P}_n) \leq C\sqrt{\frac{k}{n}},$$

*where  $\Xi = \text{Tr}(\mathbf{K}_n(\mathbf{K}_n + \mathbf{I}_n)^{-1})$  is the effective dimension of  $\mathbf{K}_n$ , and  $C$  is a constant.*

*Proof.* This can be directly proved by combining Lemma 1 and Lemma 2 of [2] by setting  $\varepsilon = 1/2$ .  $\square$

*Proof of Theorem 4.* Note that

$$\begin{aligned} &\mathbb{E}[\mathcal{W}(\mathbf{C}_{n,m}, \mathbb{P})] - \mathcal{W}^*(\mathbb{P}) \\ &= \underbrace{\mathbb{E}[\mathcal{W}(\mathbf{C}_{n,m}, \mathbb{P}) - \mathcal{W}(\mathbf{C}_{n,m}, \mathbb{P}_n)]}_{A_1} + \underbrace{\mathbb{E}[\mathcal{W}(\mathbf{C}_{n,m}, \mathbb{P}_n) - \mathcal{W}(\mathbf{C}_n, \mathbb{P}_n)]}_{A_2} \\ &\quad + \underbrace{\mathbb{E}[\mathcal{W}(\mathbf{C}_n, \mathbb{P}_n) - \mathcal{W}(\mathbf{C}_n, \mathbb{P})]}_{A_3} + \underbrace{\mathbb{E}[\mathcal{W}(\mathbf{C}_n, \mathbb{P})] - \mathcal{W}^*(\mathbb{P})}_{A_4}. \end{aligned}$$

Note that

$$\begin{aligned} A_3 &\leq \mathbb{E} \sup_{\mathbf{C} \in \mathcal{H}^k} |\mathcal{W}(\mathbf{C}, \mathbb{P}_n) - \mathcal{W}(\mathbf{C}, \mathbb{P})| \\ &\leq \frac{2}{n} \mathcal{R}(\mathcal{G}_{\mathbf{C}}) && \text{(by Eq.(16))} \\ &\leq \tilde{\mathcal{O}}\left(\sqrt{\frac{k}{n}}\right). && \text{(by Lemma 6)} \end{aligned} \tag{20}$$

One can see that  $A_4$  can be bounded by  $\tilde{\mathcal{O}}(\sqrt{k/n})$  using Theorem 1.  $A_1$  and  $A_2$  can both be bounded as  $\tilde{\mathcal{O}}(\sqrt{k/n})$  using Lemma 7 and Lemma 8, respectively.  $\square$

## Appendix: Proof of Theorem 5

*Proof.* From the definition of effective dimension, we have

$$\begin{aligned}
\Xi &= \text{Tr}(\mathbf{K}^T(\mathbf{K} + \mathbf{I})^{-1}) = \sum_{i=1}^n \frac{\lambda_i}{\lambda_i + 1} \\
&= \sum_{i=1}^{\lfloor \sqrt{k} \rfloor} \frac{\lambda_i}{\lambda_i + 1} + \sum_{i=\lfloor \sqrt{k} \rfloor + 1}^n \frac{\lambda_i}{\lambda_i + 1} \leq \sum_{i=1}^{\lfloor \sqrt{k} \rfloor} 1 + \sum_{i=\lfloor \sqrt{k} \rfloor + 1}^n \lambda_i \\
&\leq \sqrt{k} + \sum_{i=\lfloor \sqrt{k} \rfloor + 1}^n \lambda_i \leq \sqrt{k} + \sum_{i=\lfloor \sqrt{k} \rfloor + 1}^n ci^{-\alpha} \\
&\leq \sqrt{k} + c \int_{\sqrt{k}}^{\infty} x^{-\alpha} dx = \sqrt{k} + \frac{c}{\alpha - 1} \sqrt{k}^{1-\alpha} \\
&\leq \left(1 + \frac{c}{\alpha - 1}\right) \sqrt{k}.
\end{aligned}$$

Thus, we can obtain that

$$\frac{\min(k, \Xi)}{\sqrt{k}} \leq \frac{\Xi}{\sqrt{k}} \leq 1 + \frac{c}{\alpha - 1}.$$

Substituting the above inequality into Theorem 4, we can prove this result.  $\square$

## Appendix: Proof of Theorem 6

*Proof.* Note that

$$\begin{aligned}
&\mathbb{E}[\mathcal{W}(\tilde{\mathbf{C}}_{m,n}, \mathbb{P})] - \mathcal{W}^*(\mathbb{P}) \\
&= \underbrace{\mathbb{E}[\mathcal{W}(\tilde{\mathbf{C}}_{m,n}, \mathbb{P}) - \mathcal{W}(\tilde{\mathbf{C}}_{m,n}, \mathbb{P}_n)]}_{A_1} + \underbrace{\mathbb{E}[\mathcal{W}(\tilde{\mathbf{C}}_{m,n}, \mathbb{P}_n) - \mathcal{W}(\mathbf{C}_{m,n}, \mathbb{P}_n)]}_{A_2} \\
&\quad + \underbrace{\mathbb{E}[\mathcal{W}(\mathbf{C}_{m,n}, \mathbb{P}_n) - \mathcal{W}(\mathbf{C}_{m,n}, \mathbb{P})]}_{A_3} + \underbrace{\mathbb{E}[\mathcal{W}(\mathbf{C}_{m,n}, \mathbb{P})] - \mathcal{W}^*(\mathbb{P})}_{A_4}.
\end{aligned}$$

Also note that  $A_2$  is bounded by  $\zeta$ ,  $A_4$  can be obtained from Theorem 5, and  $A_1$  and  $A_3$  can be bounded by the Rademacher complexity:

$$A_1, A_3 \leq \mathbb{E} \sup_{\mathbf{C} \in \mathcal{H}^k} |\mathcal{W}(\mathbf{C}, \mathbb{P}_n) - \mathcal{W}(\mathbf{C}, \mathbb{P})| \leq \frac{2}{n} \mathcal{R}(\mathcal{G}_{\mathbf{C}}).$$

Thus, we can obtain that

$$\mathbb{E}[\mathcal{W}(\tilde{\mathbf{C}}_n, \mathbb{P})] - \mathcal{W}^*(\mathbb{P}) = \tilde{\mathcal{O}} \left( \frac{\mathcal{R}(\mathcal{G}_{\mathbf{C}})}{n} + \sqrt{\frac{k}{n}} + \zeta \right). \quad (21)$$

Substituting Lemma 6 into Eq. (21), we can prove the result.  $\square$

## Appendix: Proof of Theorem 7

*Proof.* Note that

$$\mathbb{E}[\mathbb{E}_{\mathcal{A}}[\mathcal{W}(\mathbf{C}_{n,m}^{\mathcal{A}}, \mathbb{P})]] = \mathbb{E}[\mathbb{E}_{\mathcal{A}}[\mathcal{W}(\mathbf{C}_{n,m}^{\mathcal{A}}, \mathbb{P})] - \mathbb{E}_{\mathcal{A}}[\mathcal{W}(\mathbf{C}_{n,m}^{\mathcal{A}}, \mathbb{P}_n)]] + \mathbb{E}[\mathbb{E}_{\mathcal{A}}[\mathcal{W}(\mathbf{C}_{n,m}^{\mathcal{A}}, \mathbb{P}_n)]].$$

By Lemma 2, we can obtain that

$$\begin{aligned}
&\mathbb{E}[\mathbb{E}_{\mathcal{A}}[\mathcal{W}(\mathbf{C}_{n,m}^{\mathcal{A}}, \mathbb{P}_n)]] \leq \beta \cdot \mathbb{E}[\mathcal{W}(\mathbf{C}_{n,m}, \mathbb{P}_n)] \\
&= \beta \cdot \mathbb{E}[\mathcal{W}(\mathbf{C}_{n,m}, \mathbb{P}_n) - \mathcal{W}(\mathbf{C}_{n,m}, \mathbb{P})] + \beta \cdot \mathbb{E}[\mathcal{W}(\mathbf{C}_{n,m}, \mathbb{P})].
\end{aligned}$$



Thus, we can obtain that

$$\begin{aligned}
& \mathbb{E} \left[ \mathbb{E}_{\mathcal{A}} [\mathcal{W}(\mathbf{C}_{n,m}^{\mathcal{A}}, \mathbb{P})] \right] \\
& \leq \underbrace{\mathbb{E} \left[ \mathbb{E}_{\mathcal{A}} [\mathcal{W}(\mathbf{C}_{n,m}^{\mathcal{A}}, \mathbb{P})] - \mathbb{E}_{\mathcal{A}} [\mathcal{W}(\mathbf{C}_{n,m}^{\mathcal{A}}, \mathbb{P}_{n,m})] \right]}_{A_1} \\
& \quad + \underbrace{\beta \cdot \mathbb{E} \left[ \mathcal{W}(\mathbf{C}_{n,m}, \mathbb{P}_{n,m}) - \mathcal{W}(\mathbf{C}_{n,m}, \mathbb{P}) \right]}_{A_2} + \underbrace{\beta \cdot \mathbb{E} \left[ \mathcal{W}(\mathbf{C}_{n,m}, \mathbb{P}) \right]}_{A_3}.
\end{aligned}$$

Note that

$$\begin{aligned}
A_1, A_2 & \leq \mathbb{E} \sup_{\mathbf{C} \in \mathcal{H}^k} |\mathcal{W}(\mathbf{C}, \mathbb{P}_n) - \mathcal{W}(\mathbf{C}, \mathbb{P})| \\
& \leq \frac{2}{n} \mathcal{R}(\mathcal{G}_{\mathbf{C}}) && \text{(by Eq. (16))} \\
& = \tilde{\mathcal{O}} \left( \sqrt{\frac{k}{n}} \right) && \text{(by Lemma 6).}
\end{aligned}$$

By Corollary 5,  $A_3$  can be bounded:

$$A_3 = \mathbb{E}[\mathcal{W}(\mathbf{C}_{n,m}, \mathbb{P})] \leq \mathcal{W}^*(\mathbb{P}) + c \sqrt{\frac{k}{n}} \log^2(\sqrt{n}).$$

This proves the result.  $\square$

## Appendix: Proof of Lemma 2

We first prove that the maximum Rademacher complexity can be bounded by  $3\sqrt{n}$ . Then, following the same idea as [5] and using the Khintchine inequality [6], we show that there exists a hypothesis function  $\mathcal{F}_{\mathbf{C}}$  such that  $\mathcal{R}_n(\mathcal{G}_{\mathbf{C}}) \geq \sqrt{\frac{kn}{2}}$ .

**Lemma 9** (Khintchine inequality with  $p = 1$  in [6]). *Let  $\sigma_1, \dots, \sigma_n$  be Rademacher variables with equal probability of taking values  $+1$  or  $-1$ . Then, we have  $\mathbb{E}_{\sigma} \left| \sum_{i=1}^n \sigma_i \right| \geq \sqrt{\frac{n}{2}}$ .*

*Proof of Lemma 2.* Let  $\epsilon_1, \dots, \epsilon_k$  be independent random variables with equal probability of taking values  $+1$  or  $-1$ . Let  $\mathbf{C} = (\epsilon_1 \boldsymbol{\nu}_1, \dots, \epsilon_k \boldsymbol{\nu}_k)$ , where  $\boldsymbol{\nu}_i$  is the  $i$ th standard basis function in  $\mathcal{H}$ , that is  $\langle \boldsymbol{\nu}_i, \boldsymbol{\nu}_j \rangle = 1$  if  $i = j$ , otherwise 0. We choose the hypothesis space

$$\mathcal{F}_{\mathbf{C}} = \left\{ f_{\mathbf{C}} = (f_{\epsilon_1 \boldsymbol{\nu}_1}, \dots, f_{\epsilon_k \boldsymbol{\nu}_k}) \mid f_{\epsilon_i \boldsymbol{\nu}_i}(\mathbf{x}) = \|\Phi_{\mathbf{x}} - \epsilon_i \boldsymbol{\nu}_i\|^2, \epsilon \in \{\pm 1\}^k \right\}. \quad (22)$$

Assume that  $n$  is divisible by  $k$ . We set  $\Phi_1, \dots, \Phi_{n/k} = \boldsymbol{\nu}_1, \Phi_{(n+1)/k}, \dots, \Phi_{2n/k} = \boldsymbol{\nu}_2, \dots$ , and so on, and let  $i_t$  be the index such that  $\Phi_t = \boldsymbol{\nu}_{i_t}$ . Let  $\boldsymbol{\sigma}' \in \{\pm 1\}^n$  be Rademacher variables. From the

definition of clustering Rademacher complexity, we can obtain that

$$\begin{aligned}
& \mathcal{R}_n(\mathcal{G}_{\mathbf{C}}) = \mathcal{R}_n(\varphi \circ \mathcal{F}_{\mathbf{C}}) \\
&= \mathbb{E}_{\sigma' \in \{\pm 1\}^n} \sup_{\epsilon \in \{\pm 1\}^k} \left| \sum_{t=1}^n \sigma'_t \min_{1 \leq i \leq k} \|\Phi_t - \epsilon_i \nu_i\|^2 \right| \\
&= \mathbb{E}_{\sigma' \in \{\pm 1\}^n} \sup_{\epsilon \in \{\pm 1\}^k} \left| \sum_{t=1}^n \sigma'_t \min_{1 \leq i \leq k} (2 - 2\langle \Phi_t, \epsilon_i \nu_i \rangle) \right| \\
&\quad (\text{since } \Phi_t = \nu_{i_t} \text{ and } \nu_i \text{ is the } i\text{th standard basis function in } \mathcal{H}) \\
&= 2\mathbb{E}_{\sigma' \in \{\pm 1\}^n} \sup_{\epsilon \in \{\pm 1\}^k} \left| \sum_{t=1}^n \sigma'_t \max_{1 \leq i \leq k} \langle \Phi_t, \epsilon_i \nu_i \rangle \right| \\
&= 2\mathbb{E}_{\sigma' \in \{\pm 1\}^n} \sup_{\epsilon \in \{\pm 1\}^k} \left| \sum_{t=1}^n \sigma'_t \max\{\epsilon_{i_t}, 0\} \right| \tag{23} \\
&\geq 2\mathbb{E}_{\sigma' \in \{\pm 1\}^n} \sup_{\epsilon \in \{\pm 1\}^k} \sum_{t=1}^n \sigma'_t \max\{\epsilon_{i_t}, 0\} \\
&= 2k \cdot \mathbb{E}_{\sigma' \in \{\pm 1\}^{n/k}} \sup_{\epsilon \in \{\pm 1\}^{n/k}} \sum_{t=1}^{n/k} \sigma'_t \max\{\epsilon, 0\} \\
&= 2k \cdot \frac{1}{2} \mathbb{E}_{\sigma' \in \{\pm 1\}^{n/k}} \left| \sum_{t=1}^{n/k} \sigma'_t \right| \geq k \sqrt{\frac{n}{2k}} \quad (\text{by Lemma 9}) \\
&= \sqrt{\frac{nk}{2}}.
\end{aligned}$$

From Lemma 5, we know that

$$\max_i \tilde{\mathcal{R}}_n(\mathcal{F}_{\mathbf{C}_i}) \leq 3\sqrt{n}.$$

Thus, by the above upper bounds the lower bound (Eq.(23)), we can prove that there exists a hypothesis space  $\mathcal{F}_{\mathbf{C}}$  defined in (22), such that

$$\mathcal{R}_n(\mathcal{G}_{\mathbf{C}}) \geq \frac{\sqrt{k}}{3\sqrt{2}} \cdot \max_i \tilde{\mathcal{R}}_n(\mathcal{F}_{\mathbf{C}_i}).$$

This proves the result.  $\square$

## References

- [1] P. Bartlett and S. Mendelson. Rademacher and Gaussian complexities: Risk bounds and structural results. *Journal of Machine Learning Research*, 3:463–482, 2002.
- [2] D. Calandriello and L. Rosasco. Statistical and computational trade-offs in kernel k-means. In *Advances in Neural Information Processing Systems (NeurIPS)*, pages 9357–9367, 2018.
- [3] G. B. L. Devroye and G. Lugosi. On the performance of clustering in hilbert spaces. *IEEE Transactions on Information Theory*, 54(2):781–790, 2008.
- [4] L. Devroye, L. Györfi, and G. Lugosi. *A Probabilistic Theory of Pattern Recognition*. New York: Springer-Verlag, 1996.
- [5] D. Foster and A. Rakhlin.  $\ell_\infty$  vector contraction for Rademacher complexity. *arXiv preprint arXiv:1911.06468*, 2019.
- [6] U. Haagerup. The best constants in the khintchine inequality. *Studia Mathematica*, 70(3):231–283, 1981.

- [7] Y. Lei, Ürün Dogan, D.-X. Zhou, and M. Kloft. Data-dependent generalization bounds for multi-class classification. *IEEE Transactions on Information Theory*, 65(5):2995–3021, 2019.
- [8] L. Oneto, A. Ghio, S. Ridella, and D. Anguita. Local Rademacher complexity: Sharper risk bounds with and without unlabeled samples. *Neural Networks*, 65:115–125, 2015.
